# Supplementary material
Source: PubMed Central journal article supplement (PMC2290552)
Supplement: jphysiol_543_3_767__1.pdf [file jphysiol_543_3_767__1.pdf]

# The induction of mossy fibre LTP

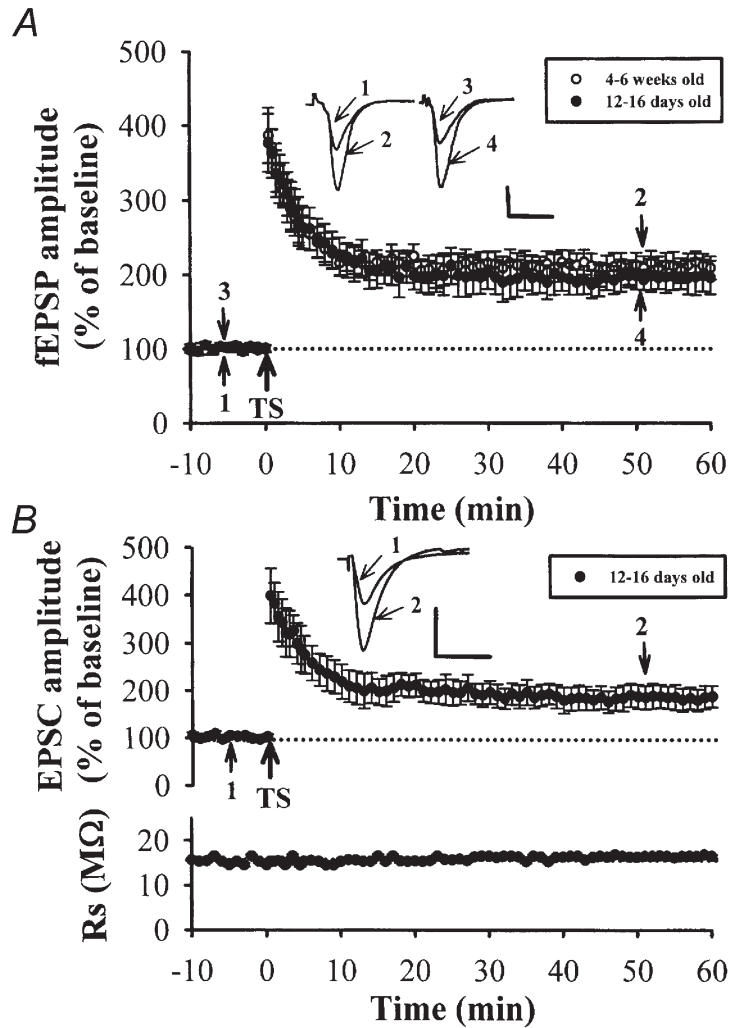

A, summary of experiments showing that tetanic stimulation of mossy fibre produced a robust LTP of fEPSPs in slices obtained from both 4- to 6-week-old (○;  $n = 12$ ) or 12- to 16-day-old mice (●;  $n = 6$ ). B, summary of experiments ( $n = 5$ ) showing that tetanic stimulation of mossy fibre elicited a robust LTP of whole-cell EPSCs at  $-70$  mV holding potential. Series resistances ( $R_s$ ) were continuously monitored throughout the experiments.
